# Supplementary material for: Nonsense-associated altered splicing of MAP3K1 in two siblings with 46,XY disorders of sex development
Source: PubMed Central journal article supplement (PMC7567082; doi:10.1038/s41598-020-74405-1), 2020-10-15
Supplement: 41598_2020_74405_MOESM1_ESM.pdf [file 41598_2020_74405_MOESM1_ESM.pdf]

# Nonsense-associated altered splicing of *MAP3K1* in two siblings with 46,XY disorders of sex development

Maki Igarashi<sup>1†</sup>, Yohei Masunaga<sup>2</sup>, Yuichi Hasegawa<sup>3</sup>, Kenichi Kinjo<sup>1,2</sup>, Mami Miyado<sup>1</sup>,  
Hiroto Saito<sup>4</sup>, Yuko Kato-Fukui<sup>1</sup>, Reiko Horikawa<sup>5</sup>, Yomiko Okubo<sup>6</sup>,  
Tsutomu Ogata<sup>2\*</sup> & Maki Fukami<sup>1\*</sup>

<sup>1</sup>Department of Molecular Endocrinology, National Research Institute for Child Health and Development, Tokyo, Japan.

<sup>2</sup>Department of Pediatrics, Hamamatsu University School of Medicine, Hamamatsu, Japan.

<sup>3</sup>Division of Urology, National Center for Child Health and Development, Tokyo, Japan.

<sup>4</sup>Department of Biochemistry, Hamamatsu University School of Medicine, Hamamatsu, Japan.

<sup>5</sup>Division of Endocrinology and Metabolism, National Center for Child Health and Development, Tokyo, Japan.

<sup>6</sup>Department of Pediatrics, Shizuoka Saiseikai Hospital, Shizuoka, Japan.

† Present address: Laboratory of Health Nutrition, Department of Applied Biological Chemistry, Graduate School of Agricultural and Life Sciences, The University of Tokyo, Tokyo 113-8657, Japan.

**Correspondence and requests for materials should be addressed to:** M.F. (fukami-m@ncchd.go.jp) or T.O. (tomogata@hama-med.ac.jp)

**Supplementary figure 1.**

The full gel image of RT-PCR analysis (Figure 1C). Lane 1, molecular weight marker; lanes 2 and 6, patient 1; lanes 3 and 7, patient 2; lanes 4 and 8, the mother; lanes 5 and 9, an unaffected individual; and lane 10, negative control. Samples for lanes 2-5 were treated with cycloheximide.

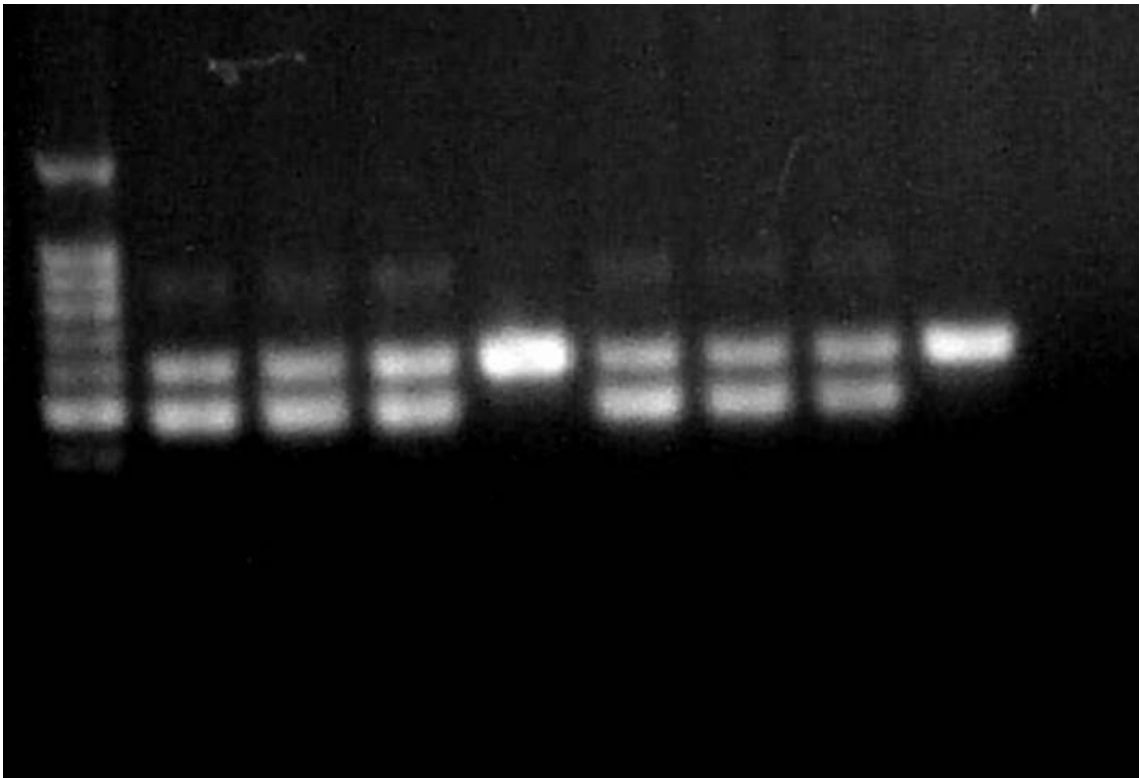

**Supplementary figure 2.**

The full length gel image of western blot analysis (Figure 1E). Three lanes in the left panel show the results of cells expressing the wild-type (lane 1) and variant MAP3K1 (lanes 2 and 3, cells from two independent transfections).

Three lanes in the right panel show the results of cells transiently transfected with GFP-MAP3K1 expression vectors. Because the poor expression of MAP3K1 is indicative of poor transfection efficacy of the GFP-tagged vectors, we did not utilize these vectors for further analysis.

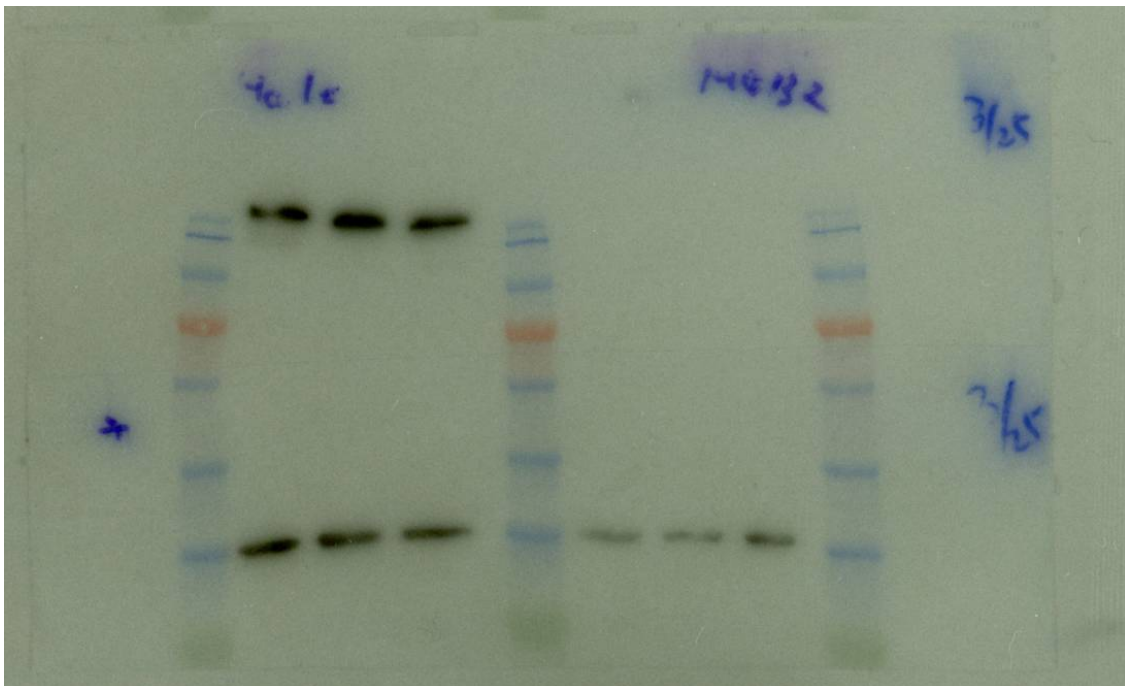

**Table S1. Rare variants of patients 1 and 2 identified by whole exome analysis**

| Identified variant                                                                   |                                                      | Frequency in public databases (MAF) |                         |        |          |             | <i>In silico</i> pathogenic analyses |                            |                    |                          | Known disease                            |    |
|--------------------------------------------------------------------------------------|------------------------------------------------------|-------------------------------------|-------------------------|--------|----------|-------------|--------------------------------------|----------------------------|--------------------|--------------------------|------------------------------------------|----|
| Gene                                                                                 | Variant                                              | gnomAD                              | HGVD                    | 2KJPN  | In-house | CADD        | PP2_HDIV                             | SIFT                       | MutationTaster     | OMIM                     | Inheritance                              |    |
| (Location)                                                                           |                                                      | genome                              | EAS* exome              | EAS*   |          | PHRED score | score                                | score                      | score              |                          |                                          |    |
| <b>&lt;Variants completely absent from the public and in-house databases&gt;</b>     |                                                      |                                     |                         |        |          |             |                                      |                            |                    |                          |                                          |    |
| <i>MAP3K1</i>                                                                        | NM_005921.1:c.2254C>T:<br>(5q11.2) p.(Gln752*)       | None                                | None                    | None   | None     | None        | 1% most deleterious<br>40.0          | -                          | -                  | Disease causing<br>1.000 | 46,XY sex reversal 6 (#613762)           | AD |
| <i>IPO11</i>                                                                         | NM_001134779.1:c.2080G>C:<br>(5q12.1) p.(Asp694His)  | None                                | None                    | None   | None     | None        | 1% most deleterious<br>29.1          | Probably damaging<br>1.000 | Damaging<br>0.003  | Disease causing<br>1.000 |                                          |    |
| <i>PDE8B</i>                                                                         | NM_003719.3:c.1998C>A:<br>(5q13.3) p.(Phe666Leu)     | None                                | None                    | None   | None     | None        | 1% most deleterious<br>24.4          | Probably damaging<br>1.000 | Damaging<br>0.000  | Disease causing<br>1.000 | Striatal degeneration (#609161)          | AD |
| <i>NPY</i>                                                                           | NM_000905.3:c.58G>A:<br>(7p15.3) p.(Val20Met)        | None                                | None                    | None   | None     | None        | 1% most deleterious<br>24.0          | Possibly damaging<br>0.630 | Damaging<br>0.014  | Polymorphism<br>0.904    |                                          |    |
| <i>TBATA</i>                                                                         | NM_001318241.1:c.547_570del<br>(10q22.1) :           | None                                | None                    | None   | None     | None        | -                                    | -                          | -                  | -                        |                                          |    |
| <i>MRPL17</i>                                                                        | NM_022061.3:c.327G>T:<br>(11p15.4) p.(Gln109His)     | None                                | None                    | None   | None     | None        | Deleterious<br>19.1                  | Benign<br>0.003            | Tolerated<br>0.155 | Disease causing<br>0.956 |                                          |    |
| <i>C2CD5</i>                                                                         | NM_001286174.1:c.1166A>C:<br>(12p12.1) p.(Asp389Ala) | None                                | None                    | None   | None     | None        | 1% most deleterious<br>32.0          | Benign<br>0.527            | Damaging<br>0.002  | Disease causing<br>1.000 |                                          |    |
| <i>SPAG5</i>                                                                         | NM_006461.3:c.2300A>C:<br>(17q11.2) p.(Gln767Pro)    | None                                | None                    | None   | None     | None        | 1% most deleterious<br>23.7          | Probably damaging<br>0.993 | Damaging<br>0.000  | Polymorphism<br>0.810    |                                          |    |
| <b>&lt;Variants not completely absent from the public and in-house databases&gt;</b> |                                                      |                                     |                         |        |          |             |                                      |                            |                    |                          |                                          |    |
| <i>SCNN1D</i>                                                                        | NM_001130413.3:c.236C>T:<br>(1p36.33) p.(Pro79Leu)   | None                                | None                    | 0.0024 | 0.0013   | 0.0023      | Non-deleterious<br>0.011             | Benign<br>0.000            | Damaging<br>0.000  | Polymorphism<br>1.000    |                                          |    |
| <i>ENO1</i>                                                                          | NM_001428.5:c.985G>A:<br>(1p36.23) p.(Ala329Thr)     | None                                | 0.0000<br>(0.000004061) | None   | None     | 0.0023      | Deleterious<br>14.4                  | Benign<br>0.002            | Tolerated<br>0.074 | Disease causing<br>1.000 |                                          |    |
| <i>MFN2</i>                                                                          | NM_014874.3:c.13T>G:<br>(1p36.22) p.(Phe5Val)        | None                                | None                    | None   | None     | 0.0023      | 1% most deleterious<br>25.1          | Possibly damaging<br>0.993 | Damaging<br>0.007  | Disease causing<br>1.000 | Charcot-Marie-Tooth disease 2a (#609260) | AD |
| <i>EPHA2</i>                                                                         | NM_004431.4:c.1382C>A:<br>(1p36.13) p.(Pro461Gln)    | None                                | 0.0003                  | 0.0014 | None     | 0.0023      | Non-deleterious<br>1.47              | Benign<br>0.118            | Tolerated<br>0.598 | Polymorphism<br>1.000    | Cataract 6, multiple types (#116600)     | AD |
| <i>ITGA10</i>                                                                        | NM_003637.4:c.3223C>G:<br>(1q21.1) p.(Arg1075Gly)    | None                                | None                    | None   | None     | 0.0023      | 1% most deleterious<br>23.2          | Probably damaging<br>0.955 | -                  | -                        |                                          |    |
| <i>CHD1L</i>                                                                         | NM_004284.5:c.2345T>C:<br>(1q21.1) p.(Leu782Ser)     | None                                | 0.0007                  | 0.0027 | 0.0047   | 0.0023      | 1% most deleterious<br>29.6          | Probably damaging<br>0.992 | Damaging<br>0.001  | Disease causing<br>0.996 |                                          |    |
| <i>DUSP12</i>                                                                        | NM_007240.2:c.217G>A:<br>(1q23.3) p.(Glu73Lys)       | 0.0031                              | 0.0037                  | 0.0035 | None     | 0.0023      | Deleterious<br>16.6                  | Possibly damaging<br>0.948 | Tolerated<br>0.348 | Polymorphism<br>1.000    |                                          |    |
| <i>DUSP12</i>                                                                        | NM_007240.2:c.218A>T:<br>(1q23.3) p.(Glu73Val)       | 0.0031                              | 0.0037                  | 0.0035 | None     | 0.0023      | Deleterious<br>15.1                  | Possibly damaging<br>0.867 | Tolerated<br>0.064 | Polymorphism<br>1.000    |                                          |    |
| <i>GPR37L1</i>                                                                       | NM_004767.4:c.1171C>T:<br>(1q32.1) p.(Arg391Cys)     | 0.0000<br>(0.00006466)              | 0.0000<br>(0.000004062) | None   | None     | None        | 1% most deleterious<br>29.4          | Probably damaging<br>0.999 | Damaging<br>0.009  | Polymorphism<br>0.993    |                                          |    |
| <i>PREB</i>                                                                          | NM_001330486.1:c.1019C>T:<br>(2p23.3) p.(Ser340Phe)  | 0.0000<br>(0.0001)                  | 0.0000<br>(0.0002)      | 0.0019 | 0.0027   | 0.0046      | Non-deleterious<br>9.72              | -                          | -                  | -                        |                                          |    |
| <i>GTF3C2</i>                                                                        | NM_001521.3:c.323G>A:<br>(2p23.3) p.(Arg108Gln)      | 0.0000<br>(0.00003231)              | 0.00005798              | None   | None     | None        | 1% most deleterious<br>23.4          | Possibly damaging<br>0.529 | Tolerated<br>0.184 | Polymorphism<br>0.884    |                                          |    |
| <i>POTEE</i>                                                                         | NM_001083538.1:c.1995G>A:<br>(2q21.1) p.(Met665Ile)  | 0.0031                              | 0.0011                  | None   | None     | None        | Non-deleterious<br>5.64              | Benign<br>0.001            | Damaging<br>0.000  | Polymorphism<br>1.000    |                                          |    |

|                              |                                             |                        |                         |        |        |        |                             |                            |                    |                          |                                                        |    |
|------------------------------|---------------------------------------------|------------------------|-------------------------|--------|--------|--------|-----------------------------|----------------------------|--------------------|--------------------------|--------------------------------------------------------|----|
| <i>TTN</i><br>(2q31.2)       | NM_133432.3:c.54400G>A:<br>p.(Gly18134Arg)  | None                   | 0.0003                  | 0.0009 | 0.0005 | None   | 1% most deleterious<br>21.4 | Possibly damaging<br>0.942 | Damaging<br>0.009  | Disease causing<br>1.000 | Cardiomyopathy, familial hypertrophic, 9<br>(#613765)  | AD |
| <i>GPR55</i><br>(2q37.1)     | NM_005683.3:c.260A>T:<br>p.(Gln87Leu)       | None                   | None                    | 0.0009 | 0.0002 | None   | Non-deleterious<br>0.001    | Benign<br>0.001            | Tolerated<br>0.205 | Polymorphism<br>1.000    |                                                        |    |
| <i>TMPRSS7</i><br>(3q13.2)   | NM_001042575.2:c.1767A>G:<br>p.(Ile589Met)  | None                   | 0.0000<br>(0.000004063) | 0.0005 | 0.001  | None   | 1% most deleterious<br>25.2 | Probably damaging<br>0.994 | Damaging<br>0.001  | Disease causing<br>0.982 |                                                        |    |
| <i>SEN2</i><br>(3q27.2)      | NM_021627.2:c.619G>A:<br>p.(Gly207Ser)      | None                   | 0.0001                  | None   | 0.0002 | 0.0023 | 1% most deleterious<br>23.2 | Probably damaging<br>1.000 | Damaging<br>0.000  | Disease causing<br>0.873 |                                                        |    |
| <i>TMEM175</i><br>(4p16.3)   | NM_032326.3:c.1363G>A:<br>p.(Val455Met)     | 0.0012                 | 0.0009                  | None   | None   | None   | Deleterious<br>11.8         | Probably damaging<br>1.000 | Damaging<br>0.011  | Disease causing<br>0.925 |                                                        |    |
| <i>RGS12</i><br>(4p16.3)     | NM_198229.2:c.4085C>G:<br>p.(Pro1362Arg)    | None                   | 0.0000<br>(0.00001229)  | None   | None   | 0.0023 | 1% most deleterious<br>23.1 | Probably damaging<br>0.971 | Damaging<br>0.000  | Disease causing<br>1.000 |                                                        |    |
| <i>ANKRD37</i><br>(4q35.1)   | NM_181726.3:c.82G>A:<br>p.(Asp28Asn)        | None                   | 0.0005                  | 0.0018 | 0.0017 | 0.0023 | 1% most deleterious<br>25.7 | Probably damaging<br>0.999 | Damaging<br>0.000  | -                        |                                                        |    |
| <i>C5orf42</i><br>(5p13.2)   | NM_023073.3:c.7478G>A:<br>p.(Arg2493Gln)    | 0.0000<br>(0.00003229) | 0.0004                  | 0.0018 | 0.002  | 0.0023 | Non-deleterious<br>9.04     | Benign<br>0.001            | Tolerated<br>0.439 | Polymorphism<br>1.000    |                                                        |    |
| <i>PELO</i><br>(5q11.2)      | NM_015946.4:c.1120T>C:<br>p.(Ser374Pro)     | 0.0000<br>(0.00003227) | 0.0009                  | 0.0009 | 0.0012 | 0.0023 | 1% most deleterious<br>23.4 | Possibly damaging<br>0.909 | Damaging<br>0.035  | Disease causing<br>1.000 |                                                        |    |
| <i>SKIV2L2</i><br>(5q11.2)   | NM_015360.4:c.43G>A:<br>p.(Gly15Ser)        | 0.0012                 | 0.0004                  | 0.0009 | 0.0015 | 0.0023 | Non-deleterious<br>9.23     | Benign<br>0.001            | Tolerated<br>0.415 | Polymorphism<br>0.999    |                                                        |    |
| <i>COL4A3B</i><br><i>P</i>   | NM_001130105.1:c.49_51del:<br>p.(Pro17del)  | None                   | 0.0002                  | None   | None   | 0.0023 | -                           | -                          | -                  | -                        | Mental retardation, autosomal dominant 34<br>(#616351) | AD |
| <i>MLIP</i><br>(6p12.1)      | NM_001281747.1:c.911A>G:<br>p.(Gln304Arg)   | None                   | 0.0006                  | None   | 0.0027 | 0.0023 | Non-deleterious<br>8.73     | Benign<br>0.301            | Tolerated<br>0.08  | Disease causing<br>0.999 |                                                        |    |
| <i>FAM20C</i><br>(7p22.3)    | NM_020223.3:c.12G>A:<br>p.(Met4Ile)         | None                   | 0.0000<br>(0.0000)      | 0.0014 | 0.0005 | 0.0023 | Non-deleterious<br>0.087    | Benign<br>0.000            | Tolerated<br>1.000 | Polymorphism<br>1.000    | Raine syndrome (#259775)                               | AR |
| <i>ELFN1</i><br>(7p22.3)     | NM_001128636.2:c.1006C>T:<br>p.(Pro336Ser)  | None                   | 0.0000<br>(0.0000)      | None   | None   | 0.0023 | 1% most deleterious<br>24.1 | Probably damaging<br>1.000 | Damaging<br>0.000  | Disease causing<br>1.000 |                                                        |    |
| <i>ZNF716</i><br>(7p11.2)    | NM_001159279.1:c.659A>G:<br>p.(Lys220Arg)   | None                   | None                    | None   | 0.0003 | 0.0023 | Non-deleterious<br>9.61     | Benign<br>0.027            | Damaging<br>0.015  | Polymorphism<br>1.000    |                                                        |    |
| <i>POM121</i><br>(7q11.23)   | NM_001257190.2:c.2246T>C:<br>p.(Met749Thr)  | 0.0006                 | 0.001                   | None   | None   | 0.0023 | Non-deleterious<br>0.001    | Benign<br>0.000            | Tolerated<br>0.857 | Polymorphism<br>1.000    |                                                        |    |
| <i>RAB11FIP1</i><br><i>I</i> | NM_001002814.2:c.3274G>C:<br>p.(Asp1092His) | 0.0043                 | 0.002                   | 0.0036 | 0.002  | 0.0023 | Deleterious<br>10.2         | Benign<br>0.002            | Tolerated<br>0.129 | Polymorphism<br>1.000    |                                                        |    |
| <i>PXDNL</i><br>(8q11.22)    | NM_144651.4:c.2878C>G:<br>p.(Arg960Gly)     | 0.0012                 | 0.0007                  | 0.0014 | 0.0005 | 0.0023 | 1% most deleterious<br>24.0 | Probably damaging<br>1.000 | Damaging<br>0.006  | Disease causing<br>1.000 |                                                        |    |
| <i>PXDNL</i><br>(8q11.22)    | NM_144651.4:c.727G>A:<br>p.(Val243Met)      | None                   | None                    | None   | None   | 0.0023 | 1% most deleterious<br>23.1 | Probably damaging<br>0.952 | Tolerated<br>0.074 | Polymorphism<br>0.966    |                                                        |    |
| <i>CSMD3</i><br>(8q23.3)     | NM_198123.1:c.746G>A:<br>p.(Ser249Asn)      | 0.0025                 | 0.0019                  | None   | 0.002  | 0.0023 | 1% most deleterious<br>24.5 | Possibly damaging<br>0.753 | Tolerated<br>0.103 | Disease causing<br>0.926 |                                                        |    |
| <i>TYRPI</i><br>(9p23)       | NM_000550.2:c.551T>C:<br>p.(Ile184Thr)      | None                   | 0.0002                  | None   | None   | None   | 1% most deleterious<br>23.8 | Probably damaging<br>0.975 | Tolerated<br>0.104 | Disease causing<br>1.000 | Albinism, oculocutaneous, type III<br>(#203290)        | AR |
| <i>ELP1</i><br>(9q31.3)      | NM_003640.4:c.208C>T:<br>p.(Arg70Cys)       | 0.0037                 | 0.0031                  | 0.0048 | 0.0029 | 0.0023 | Deleterious<br>17.7         | Benign<br>0.000            | Tolerated<br>0.228 | Polymorphism<br>0.999    |                                                        |    |
| <i>TXNDC8</i><br>(9q31.3)    | NM_001003936.3:c.20A>G:<br>p.(Asp7Gly)      | None                   | 0.0001                  | 0.0005 | 0.0007 | 0.0023 | Deleterious<br>11.4         | Benign<br>0.002            | Damaging<br>0.039  | Polymorphism<br>1.000    |                                                        |    |

|                              |                                             |                        |                         |        |        |        |                             |                            |                    |                          |                                       |    |
|------------------------------|---------------------------------------------|------------------------|-------------------------|--------|--------|--------|-----------------------------|----------------------------|--------------------|--------------------------|---------------------------------------|----|
| <i>PSMD5</i><br>(9q33.2)     | NM_005047.3:c.1199G>A:<br>p.(Arg400His)     | 0.0000<br>(0.0000646)  | 0.0000<br>(0.00001661)  | None   | None   | 0.0023 | 1% most deleterious<br>28.5 | Probably damaging<br>0.999 | Tolerated<br>0.059 | Disease causing<br>1.000 |                                       |    |
| <i>MASTL</i><br>(10p12.1)    | NM_001172303.2:c.1544A>G:<br>p.(Asp515Gly)  | None                   | 0.0006                  | 0.0018 | 0.0027 | 0.0023 | Non-deleterious<br>5.67     | Benign<br>0.001            | Tolerated<br>0.112 | Polymorphism<br>1.000    |                                       |    |
| <i>CPEB3</i><br>(10q23.32)   | NM_014912.4:c.187C>G:<br>p.(Pro63Ala)       | 0.0025                 | 0.0019                  | 0.0037 | 0.0035 | 0.0023 | Non-deleterious<br>1.80     | Benign<br>0.002            | Tolerated<br>0.138 | Polymorphism<br>0.977    |                                       |    |
| <i>HPS1</i><br>(10q24.2)     | NM_000195.4:c.1796C>T:<br>p.(Thr599Met)     | 0.0000<br>(0.0004)     | 0.0001                  | None   | 0.0012 | 0.0023 | 1% most deleterious<br>30.0 | Probably damaging<br>1.000 | Damaging<br>0.001  | Disease causing<br>1.000 | Hermansky-Pudlak syndrome 1 (#203300) | AR |
| <i>KRTAP5-6</i><br>(11p15.5) | NM_001012416.1:c.322A>C:<br>p.(Ser108Arg)   | None                   | None                    | None   | 0.0003 | 0.0023 | Non-deleterious<br>1.29     | Benign<br>0.343            | -                  | Polymorphism<br>1.000    |                                       |    |
| <i>OR52K2</i><br>(11p15.4)   | NM_001005172.2:c.725C>T:<br>p.(Thr242Ile)   | 0.0006                 | 0.0001                  | 0.0005 | 0.0005 | 0.0023 | 1% most deleterious<br>23.8 | Benign<br>0.013            | Damaging<br>0.005  | Disease causing<br>0.999 |                                       |    |
| <i>FAT3</i><br>(11q14.3)     | NM_001008781.2:c.5344G>T:<br>p.(Ala1782Ser) | None                   | 0.0000<br>(0.000004098) | None   | 0.0002 | 0.0023 | 1% most deleterious<br>27.8 | Probably damaging<br>1.000 | Damaging<br>0.003  | Disease causing<br>1.000 |                                       |    |
| <i>CACNA1C</i><br>(12p13.33) | NM_001167625.1:c.5564G>A:<br>p.(Cys1855Tyr) | 0.0037                 | 0.0024                  | 0.0005 | 0.0024 | 0.0023 | Non-deleterious<br>5.86     | Benign<br>0.000            | Tolerated<br>1.000 | Polymorphism<br>1.000    | Brugada syndrome 3 (#611875)          | -  |
| <i>PZP</i><br>(12p13.31)     | NM_002864.2:c.3800T>C:<br>p.(Leu1267Pro)    | None                   | 0.0006                  | 0.0039 | 0.0007 | None   | 1% most deleterious<br>25.6 | Probably damaging<br>1.000 | Damaging<br>0.000  | Disease causing<br>1.000 |                                       |    |
| <i>PRB2</i><br>(12p13.2)     | NM_006248.3:c.512G>A:<br>p.(Arg171Gln)      | 0.0000<br>(0.0016)     | 0.0001                  | None   | None   | None   | Non-deleterious<br>5.75     | Benign<br>0.032            | -                  | Polymorphism<br>1.000    |                                       |    |
| <i>PPFIBP1</i><br>(12p11.22) | NM_003622.3:c.2245G>C:<br>p.(Val749Leu)     | 0.0006                 | 0.0028                  | 0.0041 | 0.0015 | 0.0023 | 1% most deleterious<br>21.8 | Benign<br>0.002            | Damaging<br>0.006  | Disease causing<br>1.000 |                                       |    |
| <i>LGR5</i><br>(12q21.1)     | NM_003667.3:c.417C>A:<br>p.(Val749Leu)      | None                   | 0.0000<br>(0.00001222)  | None   | None   | None   | 1% most deleterious<br>25.0 | Probably damaging<br>0.990 | Tolerated<br>0.192 | Disease causing<br>0.885 |                                       |    |
| <i>CIT</i><br>(12q24.23)     | NM_001206999.1:c.947T>C:<br>p.(Met316Thr)   | None                   | 0.0004                  | 0.0044 | 0.0039 | 0.0046 | 1% most deleterious<br>25.4 | Benign<br>0.004            | Damaging<br>0.002  | Disease causing<br>1.000 | Microcephaly 17, primary (#617090)    | AR |
| <i>TEPI</i><br>(14q11.2)     | NM_007110.4:c.4370G>T:<br>p.(Ser1457Ile)    | None                   | 0.0002                  | None   | None   | None   | 1% most deleterious<br>22.8 | Possibly damaging<br>0.703 | Damaging<br>0.011  | Polymorphism<br>0.859    |                                       |    |
| <i>DCAF4</i><br>(14q24.2)    | NM_015604.3:c.935A>G:<br>p.(Asn312Ser)      | 0.0000<br>(0.00003228) | 0.0000<br>(0.00001625)  | None   | None   | 0.0023 | Deleterious<br>14.8         | Benign<br>0.043            | Tolerated<br>0.190 | Disease causing<br>0.656 |                                       |    |
| <i>CDC42BP</i><br><i>B</i>   | NM_006035.3:c.1552C>T:<br>p.(Arg518Cys)     | 0.0000<br>(0.00006456) | 0.0002                  | 0.0018 | 0.0005 | 0.0023 | 1% most deleterious<br>26.7 | Probably damaging<br>0.997 | Damaging<br>0.011  | Disease causing<br>1.000 |                                       |    |
| <i>FAM189A1</i><br>(15q13.1) | NM_015307.1:c.1477G>T:<br>p.(Val493Leu)     | None                   | 0.0009                  | 0.0023 | 0.0022 | 0.0023 | 1% most deleterious<br>26.6 | Probably damaging<br>0.999 | Damaging<br>0.000  | Disease causing<br>1.000 |                                       |    |
| <i>STRA6</i><br>(15q24.1)    | NM_001199040.1:c.25G>A:<br>p.(Glu9Lys)      | None                   | 0.0004                  | 0.0024 | 0.0007 | 0.0023 | Deleterious<br>18.7         | Benign<br>0.185            | Damaging<br>0.000  | Polymorphism<br>1.000    | Microphthalmia, syndromic 9 (#601186) | AR |
| <i>LINGO1</i><br>(15q24.3)   | NM_032808.6:c.1274G>A:<br>p.(Arg425His)     | 0.0000<br>(0.00006464) | 0.0000<br>(0.00008808)  | None   | None   | None   | 1% most deleterious<br>27.1 | Probably damaging<br>0.997 | Tolerated<br>0.059 | Disease causing<br>1.000 |                                       |    |
| <i>CHRNA3</i><br>(15q25.1)   | NM_000745.3:c.1290G>A:<br>p.(Arg425His)     | None                   | 0.0001                  | None   | 0.0007 | None   | Deleterious<br>15.9         | Benign<br>0.158            | Tolerated<br>1.000 | Disease causing<br>1.000 |                                       |    |
| <i>TICRR</i><br>(15q26.1)    | NM_001308025.1:c.1633C>T:<br>p.(Arg545Cys)  | 0.0043                 | 0.0019                  | 0.0009 | 0.0007 | None   | 1% most deleterious<br>21.5 | Possibly damaging<br>0.563 | Tolerated<br>0.067 | Polymorphism<br>1.000    |                                       |    |
| <i>FOXL1</i><br>(16q24.1)    | NM_005250.2:c.458A>C:<br>p.(Glu153Ala)      | 0.0031                 | 0.0046                  | None   | 0.0002 | None   | 1% most deleterious<br>20.8 | Possibly damaging<br>0.816 | Damaging<br>0.012  | Polymorphism<br>1.000    |                                       |    |
| <i>C3</i><br>(19p13.3)       | NM_000064.3:c.1955A>C:<br>p.(Gln652Pro)     | 0.0012                 | 0.001                   | None   | None   | None   | Non-deleterious<br>0.028    | Benign<br>0.080            | Tolerated<br>0.264 | Polymorphism<br>1.000    | C3 deficiency (#613779)               | AR |

|                              |                                            |                        |                         |        |        |        |                             |                            |                    |                          |                                                                                 |    |
|------------------------------|--------------------------------------------|------------------------|-------------------------|--------|--------|--------|-----------------------------|----------------------------|--------------------|--------------------------|---------------------------------------------------------------------------------|----|
| <i>ZNF709</i><br>(19p13.2)   | NM_152601.3:c.635G>A:<br>p.(Arg212Gln)     | 0.0006                 | 0.0000<br>(0.00001225)  | None   | None   | None   | 1% most deleterious<br>17.5 | Benign<br>0.169            | Tolerated<br>1.000 | Polymorphism<br>1.000    |                                                                                 |    |
| <i>PALM3</i><br>(19p13.12)   | NM_001145028.1:c.425C>A:<br>p.(Ala142Asp)  | None                   | 0.0000<br>(0.00008399)  | None   | None   | 0.0046 | 1% most deleterious<br>23.3 | Possibly damaging<br>0.835 | Damaging<br>0.003  | Polymorphism<br>1.000    |                                                                                 |    |
| <i>F2RL3</i><br>(19p13.11)   | NM_003950.3:c.1115G>C:<br>p.(Gly372Ala)    | None                   | 0.001                   | None   | None   | 0.0023 | Non-deleterious<br>0.004    | Benign<br>0.000            | Tolerated<br>0.859 | Polymorphism<br>1.000    |                                                                                 |    |
| <i>VASP</i><br>(19q13.32)    | NM_003370.3:c.397C>T:<br>p.(Pro133Ser)     | None                   | 0.0000<br>(0.000005332) | None   | None   | 0.0023 | 1% most deleterious<br>23.8 | Probably damaging<br>1.000 | Damaging<br>0.020  | Disease causing<br>1.000 |                                                                                 |    |
| <i>POLD1</i><br>(19q13.33)   | NM_001256849.1:c.511G>T:<br>p.(Ala171Ser)  | None                   | 0.0008                  | 0.0009 | 0.0005 | 0.0023 | 1% most deleterious<br>20.3 | Benign<br>0.051            | Tolerated<br>0.416 | Disease causing<br>0.996 | Mandibular hypoplasia, deafness, progeroid features, and lipodystrophy syndrome | AD |
| <i>ZNF468</i><br>(19q13.41)  | NM_001008801.1:c.1243G>A:<br>p.(Glu415Lys) | None                   | 0.002                   | 0.0024 | 0.0025 | 0.0046 | 1% most deleterious<br>13.1 | Possibly damaging<br>0.886 | -                  | Polymorphism<br>1.000    |                                                                                 |    |
| <i>RRBP1</i><br>(20p12.1)    | NM_001042576.1:c.1951G>A:<br>p.(Glu651Lys) | None                   | 0.0002                  | None   | None   | None   | 1% most deleterious<br>23.8 | Benign<br>0.016            | Tolerated<br>0.147 | Polymorphism<br>1.000    |                                                                                 |    |
| <i>MYLK2</i><br>(20q11.21)   | NM_033118.3:c.300G>T:<br>p.(Gln100His)     | None                   | None                    | None   | None   | 0.0023 | Non-deleterious<br>13.0     | Possibly damaging<br>0.61  | Damaging<br>0.023  | Polymorphism<br>1.000    | Cardiomyopathy, hypertrophic, 1, digenic (#192600)                              | AD |
| <i>RALGAPB</i><br>(20q11.23) | NM_001282917.1:c.1448G>A:<br>p.(Arg483Gln) | None                   | 0.0000<br>(0.00002844)  | None   | None   | 0.0023 | 1% most deleterious<br>22.5 | Probably damaging<br>0.997 | Tolerated<br>0.093 | Disease causing<br>1.000 |                                                                                 |    |
| <i>MYT1</i><br>(20q13.33)    | NM_004535.2:c.1709G>A:<br>p.(Arg570Lys)    | 0.0006                 | 0.0008                  | None   | 0.0002 | 0.0023 | 1% most deleterious<br>28.1 | Possibly damaging<br>0.877 | Damaging<br>0.006  | Disease causing<br>1.000 |                                                                                 |    |
| <i>CLDN17</i><br>(21q22.11)  | NM_012131.2:c.71C>A:<br>p.(Thr24Lys)       | 0.0012                 | 0.0023                  | 0.0027 | 0.0012 | 0.0023 | 1% most deleterious<br>24.9 | Probably damaging<br>0.976 | Damaging<br>0.034  | Polymorphism<br>1.000    |                                                                                 |    |
| <i>DGCR6L</i><br>(22q11.21)  | NM_033257.3:c.544C>T:<br>p.(Leu182Phe)     | None                   | 0.0004                  | 0.0036 | 0.0032 | 0.0046 | 1% most deleterious<br>22.5 | Probably damaging<br>0.997 | Tolerated<br>1.000 | Disease causing<br>1.000 |                                                                                 |    |
| <i>FBLN1</i><br>(22q13.31)   | NM_006487.2:c.1058G>A:<br>p.(Arg353His)    | 0.0000<br>(0.00009689) | 0.0001                  | 0.0014 | 0.0007 | None   | 1% most deleterious<br>29.2 | Probably damaging<br>0.999 | Damaging<br>0.011  | Disease causing<br>1.000 | Synpolydactyly, 3/3/4, associated with metacarpal and metatarsal synostoses     | AD |
| <i>TRMU</i><br>(22q13.31)    | NM_001282784.1:c.628C>T:<br>p.(Pro210Ser)  | None                   | 0.0000<br>(0.000004066) | None   | 0.0012 | None   | 1% most deleterious<br>16.1 | Benign<br>0.001            | Tolerated<br>0.260 | Polymorphism<br>0.997    | Liver failure, transient infantile (#613070)                                    | AR |

Shown are non-synonymous rare variants with minor allele frequencies (MAFs) <0.005 in gnomAD\_genome\_EAS, gnomAD\_exome\_EAS, HGVD, 2KJPN, and in-house 139 controls.

These variants have been selected as an autosomal-dominant or an X-linked recessive model. "None" indicates that the variant is not registered in the database.

The URLs utilized are as follows; *in silico* analyses were performed by using the default parameters.

1) gnomAD (Genome Aggregation Database): <http://gnomad.broadinstitute.org/>.

2) HGVD (Human Genetic Variation Database): <http://www.hgvd.genome.med.kyoto-u.ac.jp/>.

3) 2KJPN (Whole-genome sequences of 2,049 healthy Japanese individuals and construction of the highly accurate Japanese population reference panel): <https://ijgvd.megabank.tohoku.ac.jp>.

4) CADD (Combined Annotation-Dependent Depletion): <http://cadd.gs.washington.edu/score> (Current version: 1.3, GRCh37/hg19); PHRED scores of > 10-20 are regarded as deleterious, and those of > 20 indicates the 1% most deleterious.

5) Polyphen-2 Hum Var: <http://genetics.bwh.harvard.edu/pph2/> (Current version: 2.2.2, GRCh37/hg19); HumVar scores were evaluated as 0.000 (most probably benign) to 1.000 (most probably damaging).

6) SIFT (Sorting Intolerant From Tolerant): <http://sift.jcvi.org/> (Current version: Aug. 2011; GRCh37/Ensembl 63)); Scores of ≤0.05 and those > 0.05 are assessed as damaging and tolerated, respectively.

7) MutationTaster: <http://www.mutationtaster.org/> (MutationTaster2, GRCh37/Ensembl 69); Alterations are classified as disease causing or polymorphisms,.

8) OMIM (Online Mendelian inheritance in man): <http://omim.org/>

9) UCSC genome browser: <https://genome.ucsc.edu/>.

\* When the frequency in the east Asian (EAS) population (n = 811 for genomes and n = 8,624 for exomes) is 0.0000, the frequency in ALL populations (n = 15,496 for genomes and n = 123,136) for exomes is shown in parentheses.
